# Supplementary material
Source: PubMed Central journal article supplement (PMC2084463)
Supplement: NIHMS21907-supplement-Table1.pdf [file NIHMS21907-supplement-Table1.pdf]

|                | <b>Baldspot</b>                                         | <b>FKBP39</b>                                                         | <b>dIPK</b>                                   | <b>cathD</b> | <b>Atg8a</b> |
|----------------|---------------------------------------------------------|-----------------------------------------------------------------------|-----------------------------------------------|--------------|--------------|
| <b>eyGal4</b>  | no phenotype                                            | small eye, patterning defects                                         | L2 lethal                                     | no phenotype | no phenotype |
| <b>GMRGal4</b> | no phenotype                                            | rough eye                                                             | slight pigmentation defects in 20% of animals | not done     | not done     |
| <b>cgGal4</b>  | no phenotype                                            | pupal lethal, autophagy inhibited, delayed development                | no phenotype                                  | no phenotype | no phenotype |
| <b>actGal4</b> | no phenotype                                            | L3 lethal, small larvae, delayed development                          | E/L1 lethal                                   | not done     | not done     |
| <b>tubGal4</b> | no phenotype                                            | not done                                                              | E/L1 lethal                                   | not done     | not done     |
| <b>hsGal4</b>  | pupariation defects, melanotic tumors in 10% of animals | greatly enlarged nucleolus in fat body cells 8 hours after heat shock | no phenotype                                  | no phenotype | no phenotype |
